# Supplementary material for: Interdevice agreement in respiratory resistance values by oscillometry in asthmatic children
Source: PubMed Central journal article supplement — ERJ Open Res. 2019 Mar 18;5(1):00138-2018. doi: 10.1183/23120541.00138-2018 (PMC6421362; doi:10.1183/23120541.00138-2018), 2019-03-18
Supplement: 00138-2018_supp.pdf [file 00138-2018_supp.pdf]

**Inter-device agreement in respiratory resistance values by oscillometry in asthmatic  
children**

Supplemental material

Table e1  
Table e2

**Table e1. Within-test reproducibility of impedance obtained on the Tremoflo and IOS devices.**

| Parameters ∫    | N  | Coefficient of variation (%) |                    |             |               |                    |             |
|-----------------|----|------------------------------|--------------------|-------------|---------------|--------------------|-------------|
|                 |    | Tremoflo® at 5-35 Hz         |                    |             | IOS at 5-35HZ |                    |             |
|                 |    | Mean ± SD †                  | Median (25%, 75%)  | Min, Max ‡  | Mean ± SD †   | Median (25%, 75%)  | Min, Max ‡  |
| R <sub>5</sub>  | 38 | 8.12 ± 3.42                  | 8.81 (5.33, 10.80) | 0.79, 14.71 | 8.41 ± 4.55   | 9.29 (4.17, 11.97) | 0.71, 15.11 |
| Z <sub>5</sub>  | 38 | 8.11 ± 3.67                  | 8.50 (5.31, 10.48) | 2.50, 19.27 | 7.62 ± 4.03   | 9.15 (3.90, 11.04) | 0.83, 14.14 |
| Z <sub>10</sub> | 38 | 8.00 ± 3.74                  | 7.56 (4.74, 10.21) | 0.95, 15.22 | 6.34 ± 4.05   | 5.03 (3.14, 9.30)  | 1.25, 17.53 |
| Z <sub>15</sub> | 38 | 8.29 ± 4.10                  | 7.16 (4.43, 11.58) | 2.83, 17.18 | 6.88 ± 3.70   | 6.15 (3.96, 10.00) | 0.38, 15.09 |
| Z <sub>20</sub> | 38 | 9.02 ± 5.04                  | 8.27 (5.13, 12.21) | 2.09, 23.05 | 7.29 ± 4.45   | 6.51 (3.82, 10.57) | 0.59, 18.30 |
| Z <sub>25</sub> | 38 | 8.76 ± 4.48                  | 7.69 (4.88, 12.48) | 2.43, 19.57 | 7.50 ± 3.76   | 7.84 (4.55, 10.53) | 1.33, 15.08 |

† SD, Standard deviation

**Table e2. Within-patient agreement between parameters measured at 5 Hz and 7 Hz on the Tremoflo**

| Parameters          | N  | 5 Hz            |                | 7 Hz         |                | 5 Hz vs. 7 Hz     |                                         |                                 |
|---------------------|----|-----------------|----------------|--------------|----------------|-------------------|-----------------------------------------|---------------------------------|
|                     |    | Mean (SD) †     | Median (IQR) † | Mean (SD) †  | Median (IQR) † | ICC ‡             | Absolute mean difference §<br>(kPa/L/s) | Linear regression Coefficient ¶ |
|                     |    | (kPa/L/s)       | (kPa/L/s)      | (kPa/L/s)    | (kPa/L/s)      | (95% CI)          | (95% CI)                                | (95% CI)                        |
| <b>Resistance §</b> |    |                 |                |              |                |                   |                                         |                                 |
| R                   | 44 | 0.83 (0.36)     | 0.72 (0.36)    | 0.80 (0.33)  | 0.71 (0.41)    | 0.97 (0.94, 0.98) | 0.02 (-0.01, 0.06)                      | 0.12 (0.03, 0.22)               |
| R <sub>insp</sub>   | 42 | 0.80 (0.33)     | 0.71 (0.35)    | 0.76 (0.30)  | 0.68 (0.40)    | 0.97 (0.95, 0.99) | 0.04 (0.01, 0.08)                       | 0.13 (0.03, 0.23)               |
| R <sub>exp</sub>    | 42 | 0.87 (0.43)     | 0.74 (0.44)    | 0.85 (0.38)  | 0.76 (0.44)    | 0.98 (0.95, 0.99) | 0.02 (-0.02, 0.06)                      | 0.15 (0.06, 0.24)               |
| Δ R                 | 42 | -0.06 (0.21)    | -0.03 (0.10)   | -0.09 (0.16) | -0.04 (0.07)   | 0.94 (0.89, 0.97) | 0.02 (-0.01, 0.05)                      | 0.29 (0.17, 0.41)               |
| <b>Reactance §</b>  |    |                 |                |              |                |                   |                                         |                                 |
| X                   | 44 | -0.36 (0.20)    | -0.31 (0.17)   | -0.30 (0.25) | -0.22 (0.21)   | 0.94 (0.89, 0.96) | -0.07 (-0.10, -0.03)                    | -0.21 (-0.34, -0.07)            |
| X <sub>insp</sub>   | 42 | -0.38 (0.18)    | -0.34 (0.17)   | -0.30 (0.19) | -0.25 (0.18)   | 0.94 (0.90, 0.97) | -0.09 (-0.12, -0.06)                    | -0.004 (-0.16, 0.15)            |
| X <sub>exp</sub>    | 42 | -0.36 (0, 0.24) | -0.30 (0.21)   | -0.31 (0.32) | -0.21 (0.18)   | 0.95 (0.90, 0.97) | -0.05 (-0.09, -0.01)                    | -0.29 (-0.41, -0.17)            |
| Δ X                 | 42 | -0.03 (0.10)    | -0.05 (-0.08)  | 0.01 (0.20)  | -0.03 (0.05)   | 0.79 (0.62, 0.89) | -0.04 (-0.08, 0.00)                     | -0.71 (-0.89, -0.53)            |

† SD, Standard deviation; IQR, Interquartile range

‡ ICC, Intraclass correlation coefficient

§ Represents the mean within-patient absolute difference between parameters measured at 5 minus those obtained at 7 Hz.

¶ Linear regression coefficient representing the proportional bias of 7Hz vs. 5Hz parameters

§ R represents resistance; R<sub>insp</sub>, mean inspiratory resistance; R<sub>exp</sub>, mean expiratory resistance; Δ R, absolute difference between mean inspiratory minus mean expiratory resistance; X, reactance; X<sub>insp</sub>, mean inspiratory reactance; X<sub>exp</sub>, mean expiratory reactance; Δ X, absolute difference between mean inspiratory and mean expiratory reactance. Of note, within-breath parameters were not available in two patients.
